# Supplementary material for: How informative is the mouse for human gut microbiota research?
Source: PubMed Central journal article supplement (PMC4283646; doi:10.1242/dmm.017400), 2015-01
Supplement: supp_8.1.1_DMM017400.pdf [file supp_8.1.1_DMM017400.pdf]

Tables

**Supplementary Table 1:** Genera in common between mice and humans gut microbiota. Top 10 most abundant genera present in at least 1 of the 4 human studies (Consortium, 2012; Yatsunenکو et al., 2012; left column) and 1 of the 5 mouse gut microbiota datasets (Nagy-Szakal et al., 2012; Riboulet-Bisson et al., 2012; Ubeda et al., 2013; Ward et al., 2012; Zenewicz et al., 2013; right column) that were used for the analysis reported in Figure 3. Genera with significantly different abundances between human and mouse datasets are indicated with an asterisk (Wilcoxon p-value <0.05), but note that none are significant after multiple testing correction. Low-abundance genera with significantly different abundances between human and mouse datasets are listed below. For each dataset, genus abundances were normalized to the most abundant genus (100%). The mean relative abundance of each genus was calculated as its average relative abundance in all the datasets in which the genus was detected.

| Mouse TOP 10                                                                              |                             |        | Human TOP 10              |                             |        |
|-------------------------------------------------------------------------------------------|-----------------------------|--------|---------------------------|-----------------------------|--------|
| Genus                                                                                     | Mean relative abundance (%) |        | Genus                     | Mean relative abundance (%) |        |
|                                                                                           | mice                        | humans |                           | mice                        | humans |
| <i>Lactobacillus</i> *                                                                    | 63.136                      | 0.047  | <i>Prevotella</i>         | 0.869                       | 51.672 |
| <i>Clostridium</i>                                                                        | 32.243                      | 22.072 | <i>Faecalibacterium</i> * | 0.271                       | 49.409 |
| <i>Bacteroides</i>                                                                        | 25.412                      | 37.475 | <i>Bacteroides</i>        | 25.412                      | 37.475 |
| <i>Alistipes</i>                                                                          | 25.241                      | 7.554  | <i>Ruminococcus</i> *     | 1.977                       | 26.270 |
| <i>Turicibacter</i> *                                                                     | 22.553                      | 0.222  | <i>Clostridium</i>        | 32.243                      | 22.072 |
| <i>Blautia</i>                                                                            | 15.047                      | 20.266 | <i>Blautia</i>            | 15.047                      | 20.266 |
| <i>Eubacterium</i>                                                                        | 8.944                       | 9.472  | <i>Roseburia</i>          | 3.915                       | 18.156 |
| <i>Parabacteroides</i>                                                                    | 7.478                       | 5.249  | <i>Coprococcus</i>        | 1.931                       | 11.972 |
| <i>Tannerella</i>                                                                         | 5.320                       | 0.001  | <i>Eubacterium</i>        | 8.944                       | 9.472  |
| <i>Roseburia</i>                                                                          | 3.915                       | 18.156 | <i>Oscillospira</i> *     | 1.075                       | 7.708  |
| <b>Low-abundance genera with significant abundance difference between humans and mice</b> |                             |        |                           |                             |        |
|                                                                                           | mice                        | humans |                           | mice                        | humans |
| <i>Catenibacterium</i> *                                                                  | 0.031                       | 0.874  | <i>Akkermansia</i> *      | 0.003                       | 0.744  |
| <i>Lachnospira</i> *                                                                      | 0.230                       | 3.502  | <i>Haemophilus</i> *      | 0.002                       | 0.028  |
| <i>Streptococcus</i> *                                                                    | 0.066                       | 0.962  | <i>Klebsiella</i> *       | 0.002                       | 0.840  |
| <i>Catenibacterium</i> *                                                                  | 0.031                       | 0.874  | <i>Dialister</i> *        | 0.002                       | 3.856  |

**Supplementary Table 2:** Alphabetical list of mouse- and human-specific gut-associated genera. Data was extracted from the same four human studies used for Figure 3 and Supplementary Table 1 (Consortium, 2012; Yatsunenکو et al., 2012) and six mouse studies used for Figure 3B (Cho et al., 2012; Nagy-Szakal et al., 2012; Riboulet-Bisson et al., 2012; Ubeda et al., 2013; Ward et al., 2012; Zenewicz et al., 2013). Genera with less than 0.1% relative abundance were excluded. Genera with significantly different abundances between the human and mouse datasets (referenced in Supplementary Table 1) are indicated with an asterisk (Wilcoxon p-value <0.05), but note that none is significant after multiple testing correction.

| Mouse-specific             |                             |                            | Human-specific               |
|----------------------------|-----------------------------|----------------------------|------------------------------|
| Genera                     | Genera (cont.)              | Genera (cont.)             | Genera                       |
| <i>Acetanaerobacterium</i> | <i>Croceibacter</i>         | <i>Oscillibacter</i>       | <i>Acidaminococcus</i>       |
| <i>Acetitomaculum</i>      | <i>Curvibacter</i>          | <i>Paludibacter</i>        | <i>Adlercreutzia</i> *       |
| <i>Aeromicrobium</i>       | <i>Cytophaga</i>            | <i>Papillibacter</i>       | <i>Bilophila</i> *           |
| <i>Alkaliphilus</i>        | <i>Cytophagaceae</i>        | <i>Parasporobacterium</i>  | <i>Bulleidia</i> *           |
| <i>Allobaculum</i> *       | <i>Desulfonispota</i>       | <i>Pelagibacter</i>        | <i>Collinsella</i> *         |
| <i>Anaerobacter</i>        | <i>Donghicola</i>           | <i>Petrimonas</i>          | <i>Erwinia</i> *             |
| <i>Anaerophaga</i>         | <i>Erysipelothrix</i>       | <i>Rhodovulum</i>          | <i>Methanobrevibacter</i> *  |
| <i>Anaeroplasma</i>        | <i>Eubacteriaceae</i>       | <i>Rikenella</i>           | <i>Odoribacter</i> *         |
| <i>Anaerosporobacter</i>   | <i>Guggenheimella</i>       | <i>Roseobacter</i>         | <i>Phascolarctobacterium</i> |
| <i>Anaerovorax</i> *       | <i>Hespellia</i>            | <i>Ruminococcaceae I.S</i> | <i>Sutterella</i> *          |
| <i>Arthromitus</i>         | <i>Johnsonella</i>          | <i>Shigella</i>            | <i>Veillonella</i> *         |
| <i>Bryantella</i>          | <i>Lachnospiraceae</i>      | <i>Sporacetigenium</i>     |                              |
| <i>Butyricoccus</i>        | <i>Lachnospiraceae (IS)</i> | <i>Sporobacter</i>         |                              |
| <i>Caminicella</i>         | <i>Leifsonia</i>            | <i>Sporobacterium</i>      |                              |
| <i>Catonella</i>           | <i>Longispora</i>           | <i>Syntrophococcus</i>     |                              |
| <i>Clostridiaceae</i>      | <i>Marvinbryantia</i>       | <i>Tessaracoccus</i>       |                              |
| <i>Clostridiales</i>       | <i>Mucispirillum</i>        | <i>TM7 genera I.S</i>      |                              |
